# Supplementary material for: Boosting the interfacial dynamics and thermodynamics in polyanion cathode by carbon dots for ultrafast-charging sodium ion batteries
Source: Royal Society of Chemistry journal article supplement (doi:10.1039/d3sc05593k), 2023-11-30
Supplement: d3sc05593k1.pdf [file d3sc05593k1.pdf]

# **Boosting the Interfacial Dynamics and Thermodynamics in Polyanion Cathode by Carbon Dots for Ultrafast-Charging Sodium Ion Batteries**

Yujin Li <sup>a</sup>, Yu Mei <sup>a</sup>, Roya Momen <sup>b</sup>, Bai Song <sup>c</sup>, Yujie Huang <sup>a</sup>, Xue Zhong <sup>a</sup>, Hanrui Ding <sup>a</sup>, Wentao Deng <sup>a</sup>, Guoqiang Zou <sup>a</sup>, Hongshuai Hou <sup>a,\*</sup> and Xiaobo Ji <sup>a</sup>

[a] State Key Laboratory of Powder Metallurgy, College of Chemistry and Chemical Engineering, Central South University, Changsha, 410083, China

E-mail: hs-hou@csu.edu.cn

[b] Department of Chemistry and Shenzhen Grubbs Institute, Southern University of Science and Technology, Shenzhen 518055 (China)

[c] Dongying Cospowers Technology Limited Company, China

## **1. Experimental section**

### **1.1 Materials synthesis**

N/S co-doped carbon dots were prepared through our previous reported method.<sup>1</sup> Pure  $\text{Na}_3\text{V}_2(\text{PO}_4)_3$ , N/S co-doped carbon coated  $\text{Na}_3\text{V}_2(\text{PO}_4)_3$  composites, referred to as NVP and NVP/NSC, respectively, were synthesized by a one-step solid phase ball milling followed by sintering method. The N/S co-doped carbon dots were used as the reducing agent, carbon source, nitrogen source and sulfur source simultaneously. In a typical NVP/NSC synthesis method, 2 mmol  $\text{V}_2\text{O}_5$ , 6 mmol  $\text{NH}_4\text{H}_2\text{PO}_4$ , 3 mmol  $\text{Na}_2\text{CO}_3$  and 50/75/100 mg N/S doped carbon dots were ball milled in an agate ball mill jar at 500 rpm for 6 h, where the bead ratio is approximately 15:1. The chemicals above were purchased from Aladdin (Shanghai, China). The resulting precursors were then placed in a tube furnace at 350 °C for 4 h under an argon gas (Ar) atmosphere and then heating up to 850 °C at a rate of 5 °C/min. The intermediate powder was remelted and sintered for 8 h at 850 °C. The synthesis process for bare NVP was the same as the preparation of NVP/NSC, but without the addition of N/S co-doped carbon dots.

### **1.2 Materials characterization**

Determination of elemental content (C, N and S) was carried out with the elemental analyzer (EA, Elementar Vario EL Cube, GER). The samples were characterized by Fourier transform infrared spectroscopy (FT-IR, AVTA-TAR, 370) to detect characteristic functional groups. The crystal structures were characterized by X-ray diffractometer (XRD Rigaku D/max-2550 VB + 18 KW, Cu  $K\alpha$  radiation, Japan). The data were then analysed using the Rietveld structure refinement program on FullProf. Raman spectra were obtained with a RENISHAW inVia wire 4.2 spectrometer. Elemental composition and valence states were determined by X-ray photoelectron spectroscopy (XPS, Thermo Scientific K-Alpha, USA). Microscopic morphology of samples was observed by scanning electron microscopy (SEM, JEOL/JSM-7610FPlus). Detailed microstructures were observed by using a transmission electron microscope (TEM, FEI Titan G2 60-300, USA), and TEM-energy-dispersive spectroscopy (EDS) analysis was carried out by using a Bruker Super EDS detector.

### **1.3 Electrochemical measurements**

The button cells (CR 2016) were assembled in an argon-filled glove box with water and oxygen content below 0.5 ppm. A 70 wt% NVP-based sample was mixed with carbon black (Super P) (20 wt%) and polyvinylidene fluoride (PVDF) (10 wt%) in N-methylpyrrolidone (NMP) solvent to form uniform slurry and then pasted it onto a carbon coated aluminum foil, followed by vacuum drying oven at 120 °C for 12 h to prepare the positive electrode. The mass loading was 0.8 ~ 1.0 mg  $\text{cm}^{-2}$ . Sodium metal was used as the reference and counter electrode,

NaClO<sub>4</sub> in propylene carbonate (PC) and 5% fluoroethylene carbonate (FEC) (1.0 mol/L) was utilized as the electrolyte and Whatman GF/D was employed as the separator. These half-cells were subjected to constant current charge/discharge testing on a LAND CT2001 testing system (Wuhan LAND Electronics. Ltd., China) with a voltage range of 2.3-4.0 V (vs. Na<sup>+</sup>/Na). Electrochemical impedance spectra (frequency range: 0.01-10<sup>5</sup> Hz) and cyclic voltammetry (CV) were using Chenhua electrochemical workstation (CHI 660D, Chenhua, Shanghai) and Autolab electrochemical workstation (MULTI AUTOLAB M204). For the galvanostatic intermittent titration technique (GITT), a constant current of 0.1 C (1 C= 117 mA g<sup>-1</sup>) was applied for 20 min and then interrupted to achieve an open circuit condition for 120 min. The procedure was repeated until the electrode potential reached the cut-off voltage. In addition, a sodium ion full cell was constructed using NVP/NSC-75 as the cathode and hard carbon (HC) as the anode. The HC (Kuraray Co., Ltd, 70 wt%) was mixed with carbon black (20 wt%) and carboxymethyl cellulose (10 wt%) in H<sub>2</sub>O solvent to form unique slurry, and then pasted onto a copper foil, followed by vacuum drying oven at 100 °C for 12 h to prepare the negative electrode. The HC anode was cycled between a voltage range of 0.01-2.0 V (vs. Na<sup>+</sup> /Na) at a current of 0.5 A g<sup>-1</sup> for 8 cycles to reach a steady state before the full cell was assembled. The full cell has a cathode to anode capacity ratio of approximately 1:1.2 and the cell capacity is determined by the cathode. Charge and discharge measurements were carried out between 1.2 V and 3.6 V at 5 C (1 C = 117 mA g<sup>-1</sup>). For both pre-sodiation and full cells test, 1.0 M NaPF<sub>6</sub> in Diglyme was used as electrolyte.

#### 1.4 Theoretical calculations

Structural optimization was performed by Vienna Ab-initio Simulation Package (VASP)<sup>2</sup> with the projector augmented wave (PAW) method.<sup>3</sup> In order to describe the weak interactions between atoms, the exchange-functional was treated using the Perdew-Burke-Ernzerhof (PBE)<sup>4</sup> functional in combination with the DFT-D3 correction.<sup>5</sup> The cut-off energy of the plane-wave basis was set at 450 eV in structural optimization. The Brillouin zone integration was performed with a Monkhorst-Pack *k*-point mesh of 0.04 Å<sup>-1</sup> to optimise geometry and lattice size. Partial occupancies of the Kohn–Sham orbitals were allowed using the Gaussian smearing method and a width of 0.05 eV. A geometry optimization was considered convergent when the energy change was smaller than 0.05 eV Å<sup>-1</sup>. To consider the strong correlation effects of transition metal in structure, both structural optimizations and electronic structure calculations were carried out by using the spin-dependent GGA plus Hubbard correction U method.

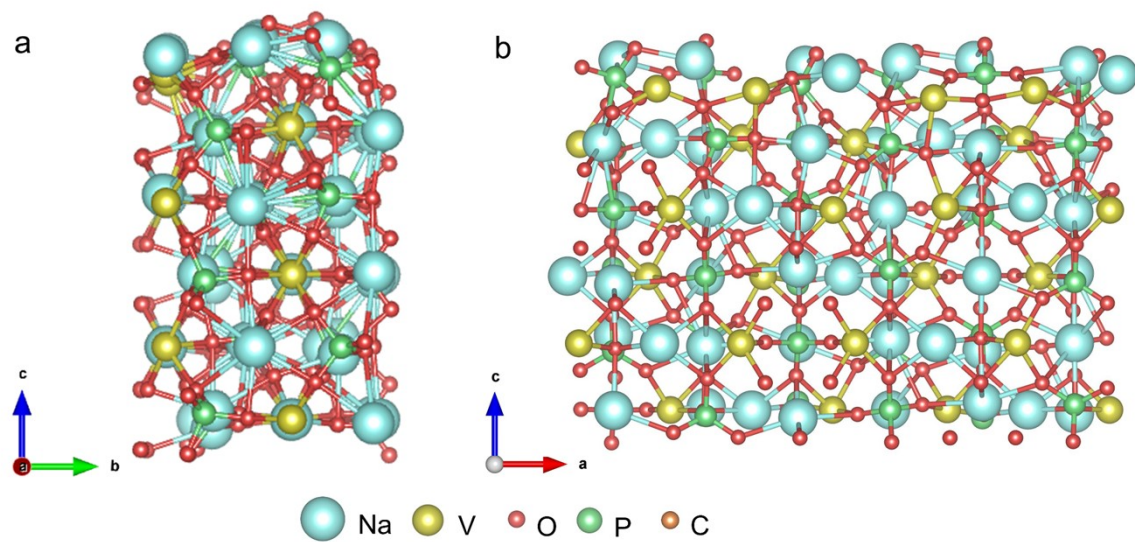

**Figure S1.** The optimized structure model of the NVP.

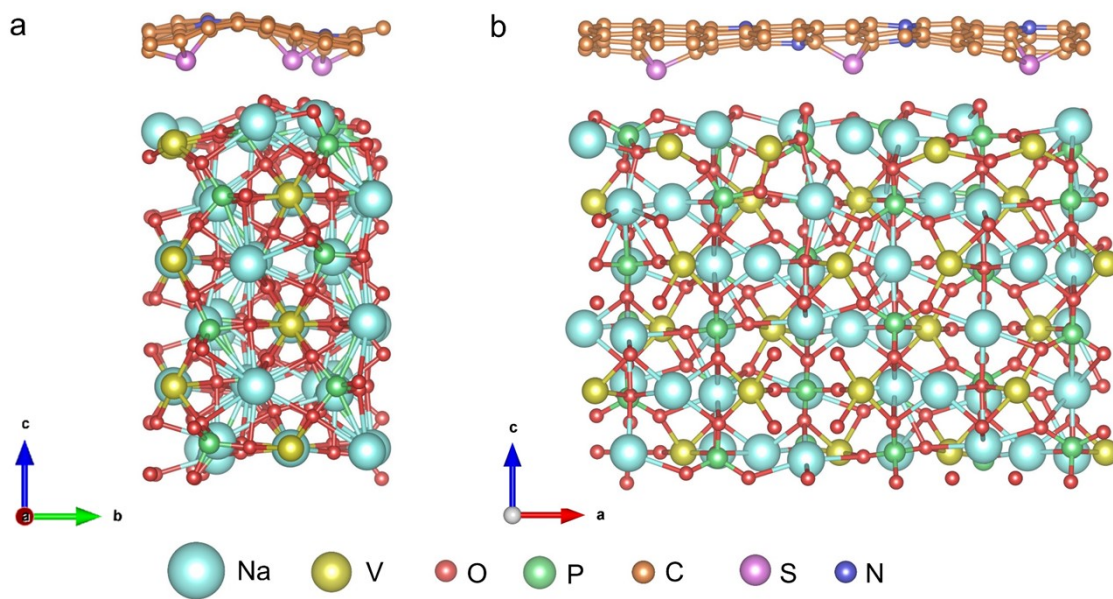

**Figure S2.** The optimized structure model of the NVP/NSC.

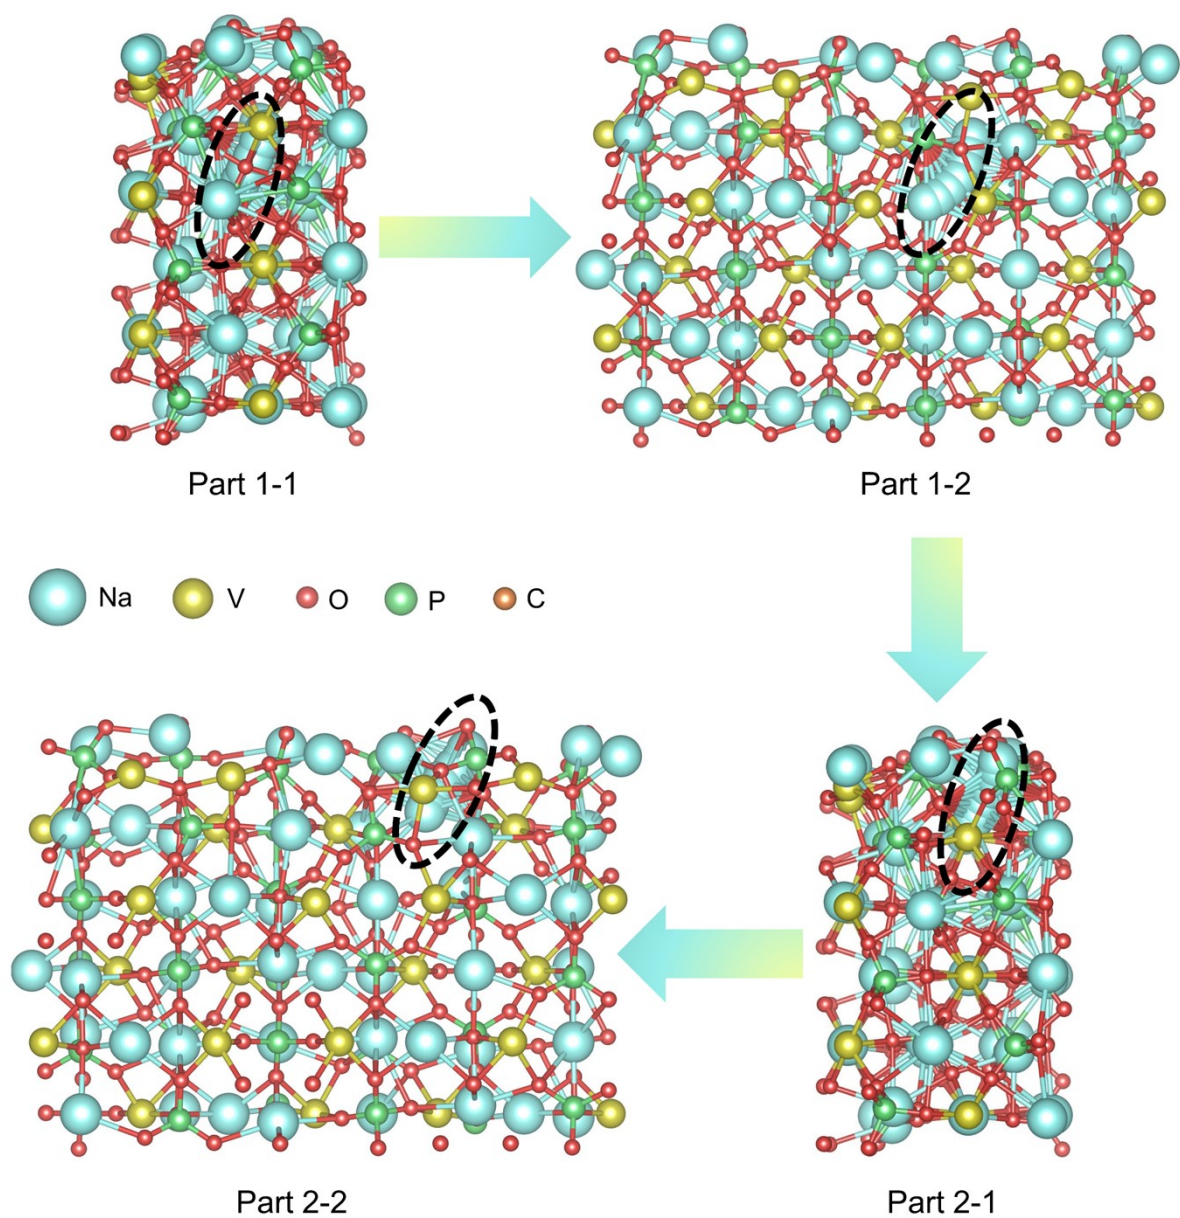

**Figure S3.** Schematic diagram of  $\text{Na}^+$  diffusion pathways and processes alongside Path II<sup>6</sup> in NVP (Inside the dashed box is the migrating sodium ions).

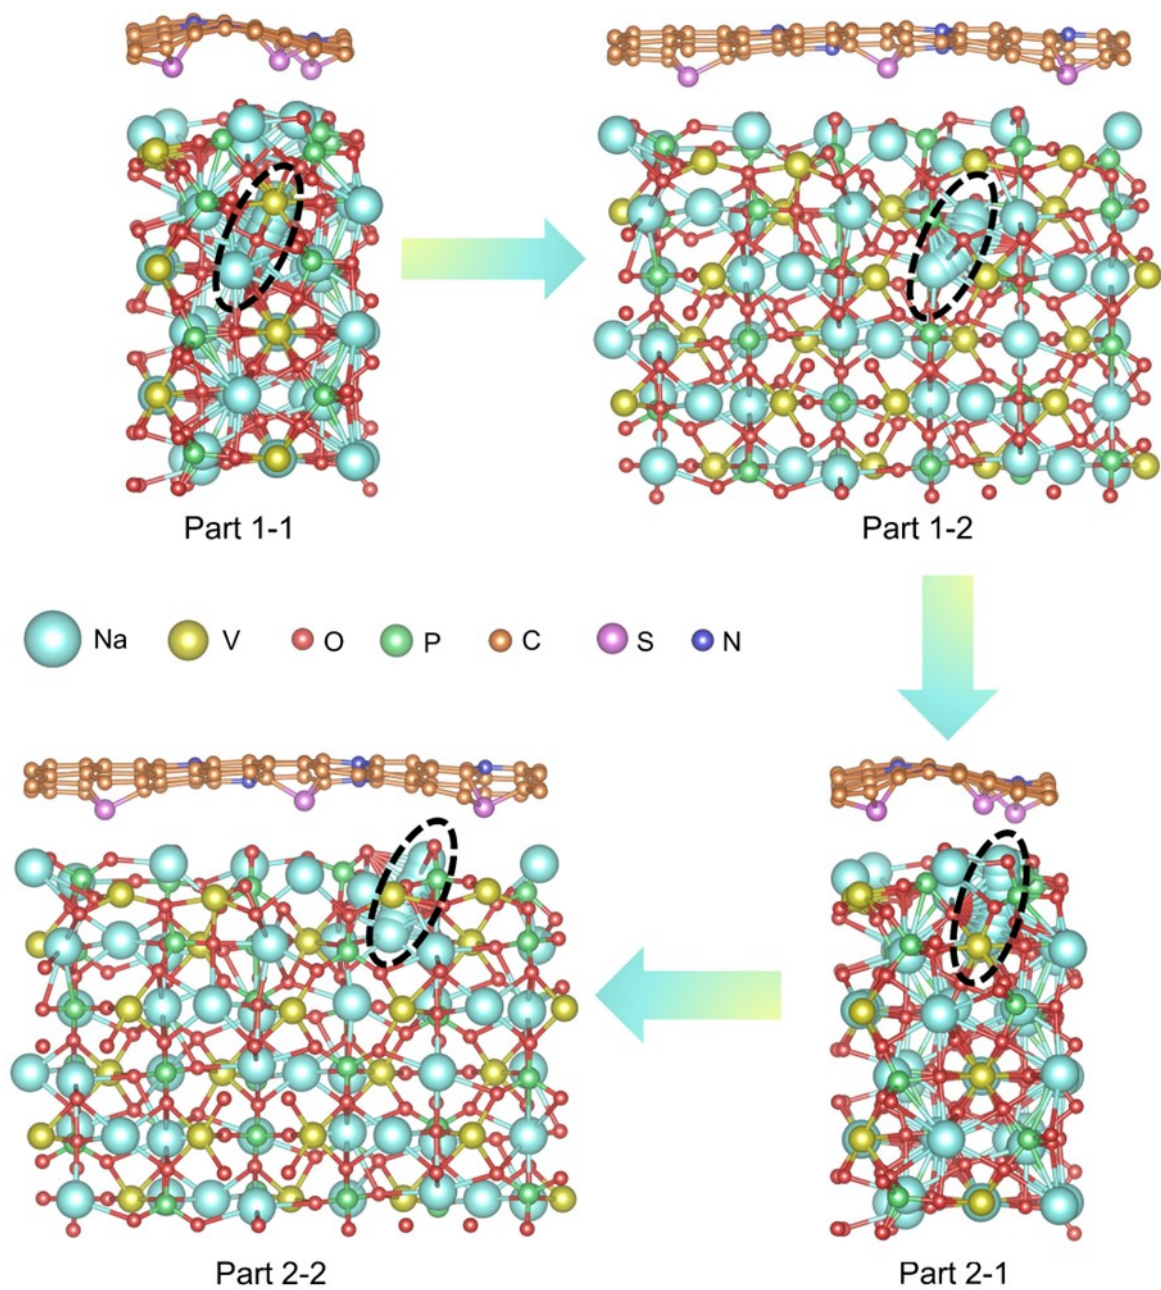

**Figure S4.** Schematic diagram of  $\text{Na}^+$  diffusion pathways and processes alongside Path II<sup>6</sup> in NVP/NSC (Inside the dashed box is the migrating sodium ions).

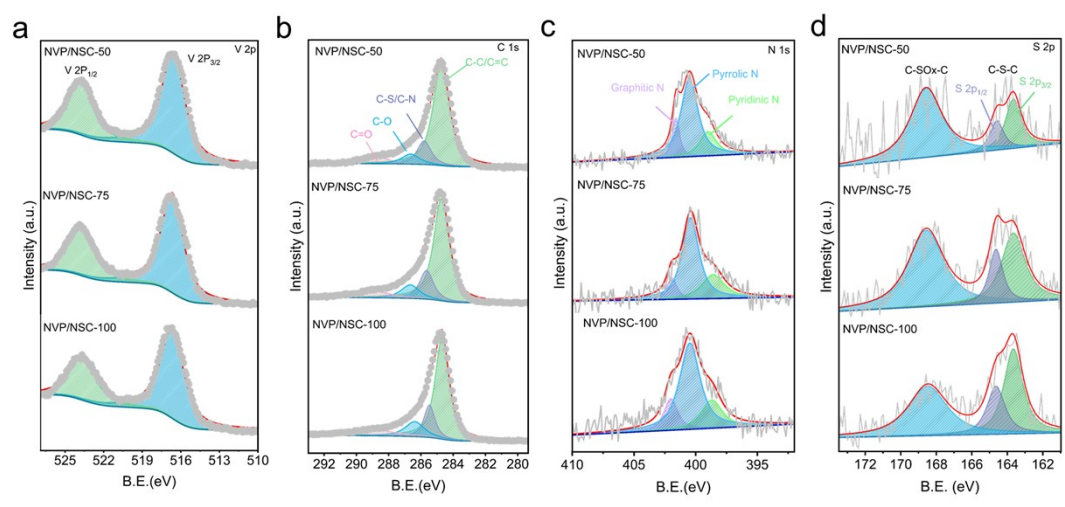

**Figure S5.** High-resolution XPS spectra of V2p (a), C1s (b), N1s (c) and S2p (d) for the NVP/NSC samples.



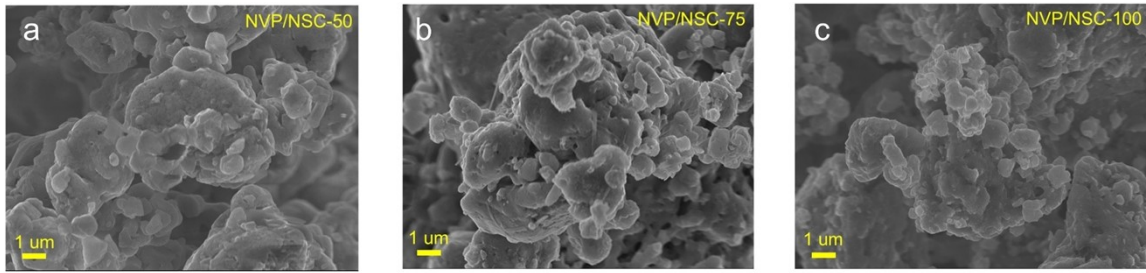

**Figure S6.** SEM images of NVP/NSC-50 (a), NVP/NSC-75 (b) and NVP/NSC-100 (c).

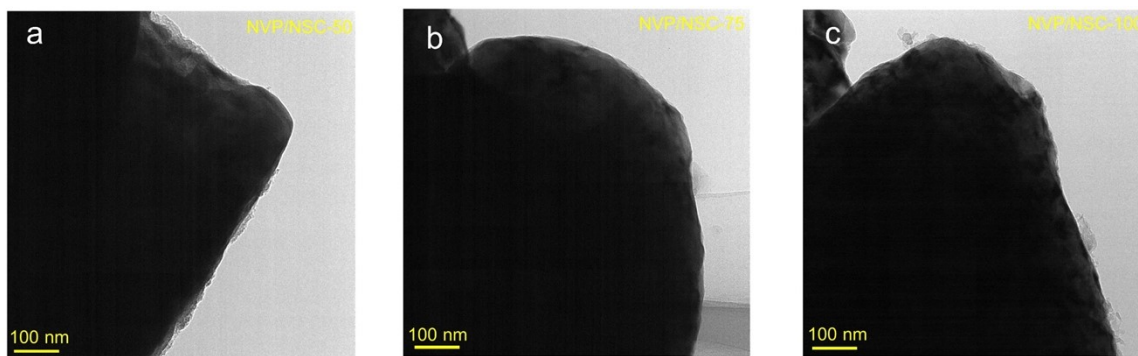

**Figure S7.** TEM images of NVP/NSC-50 (a), NVP/NSC-75 (b) and NVP/NSC-100 (c).

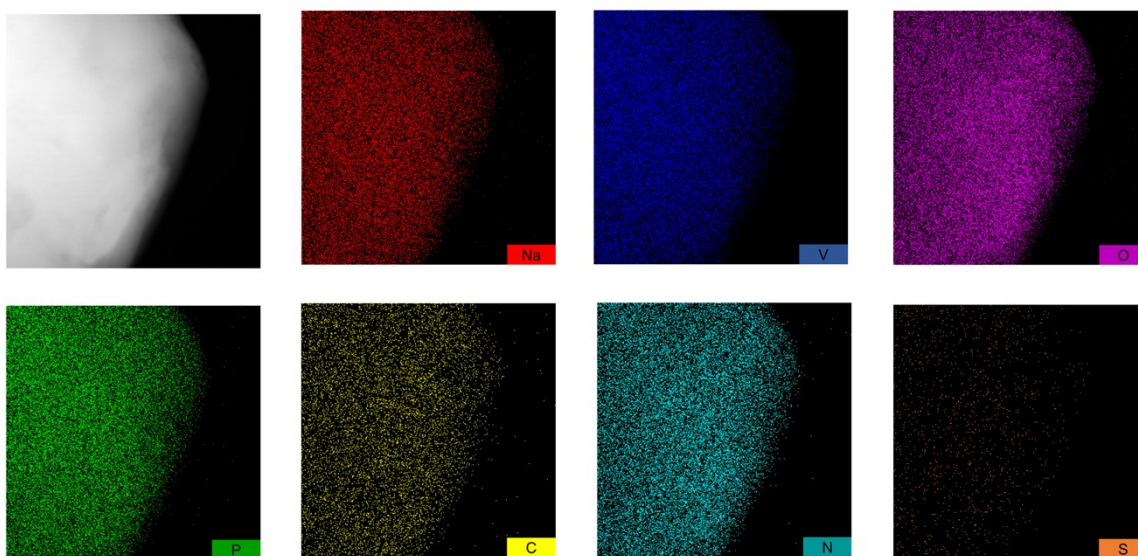

**Figure S8.** Elemental mapping images for Na, V, O, P, C, N and S in NVP/NSC-50.

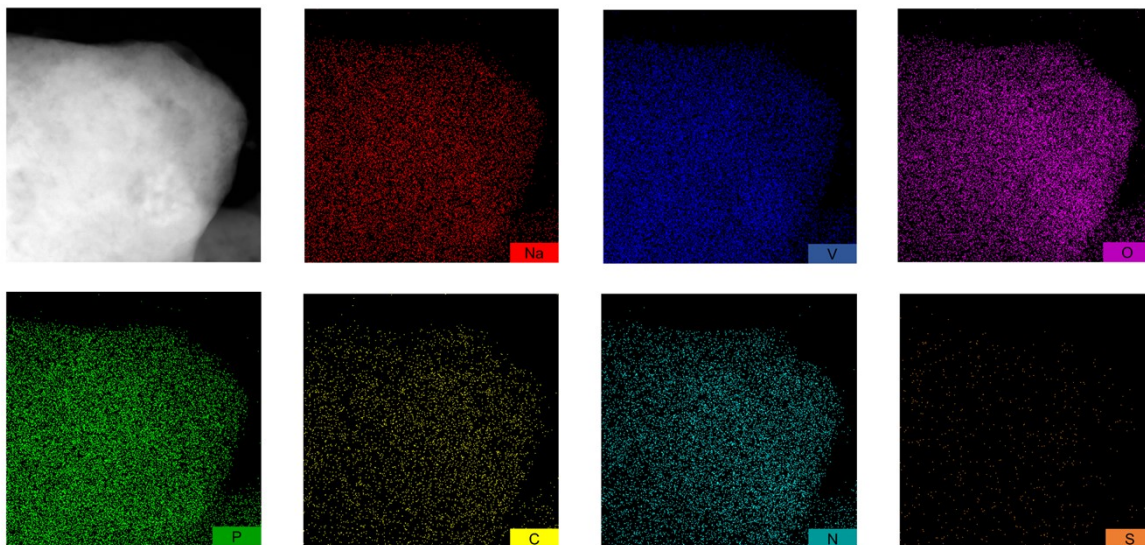

**Figure S9.** Elemental mapping images for Na, V, O, P, C, N and S in NVP/NSC-100.

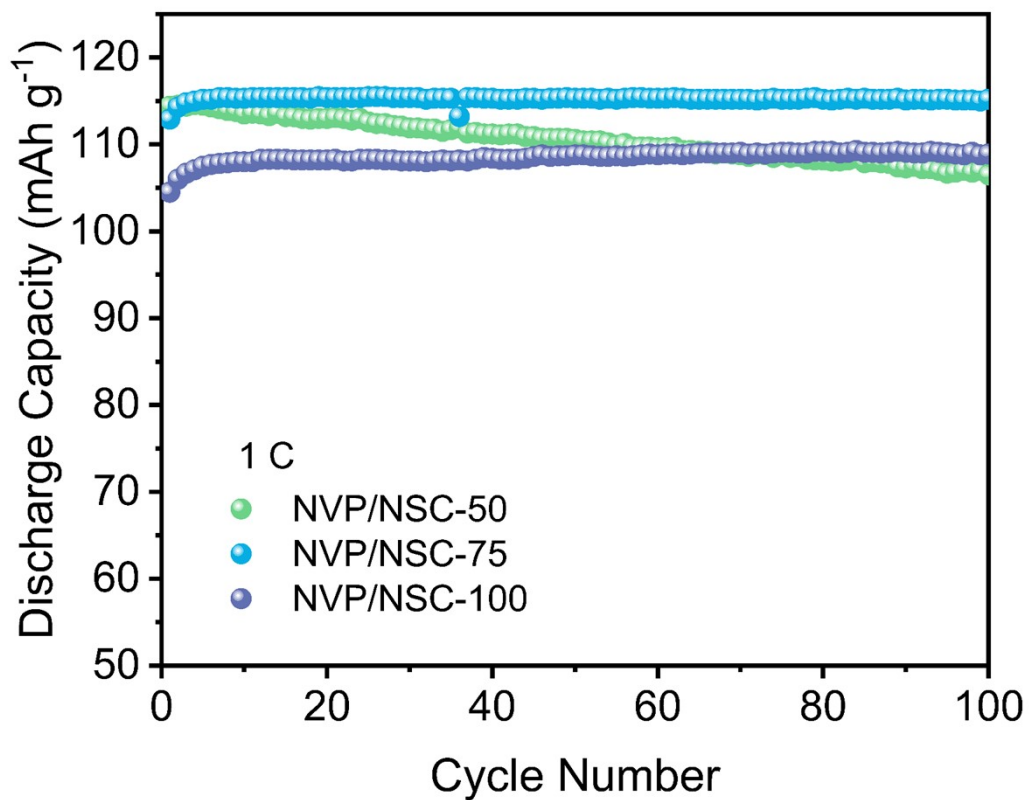

**Figure S10.** Cycling performances of NVP/NSC samples at the rate of 1 C for 100 cycles.

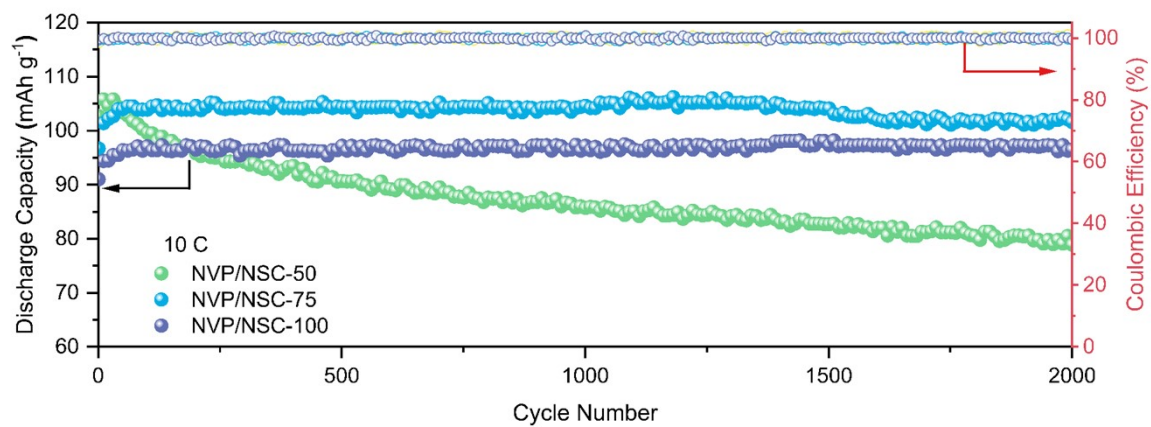

**Figure S11.** Specific capacities and coulombic efficiencies of NVP/NSC samples at the rate of 10 C for 2000 cycles.

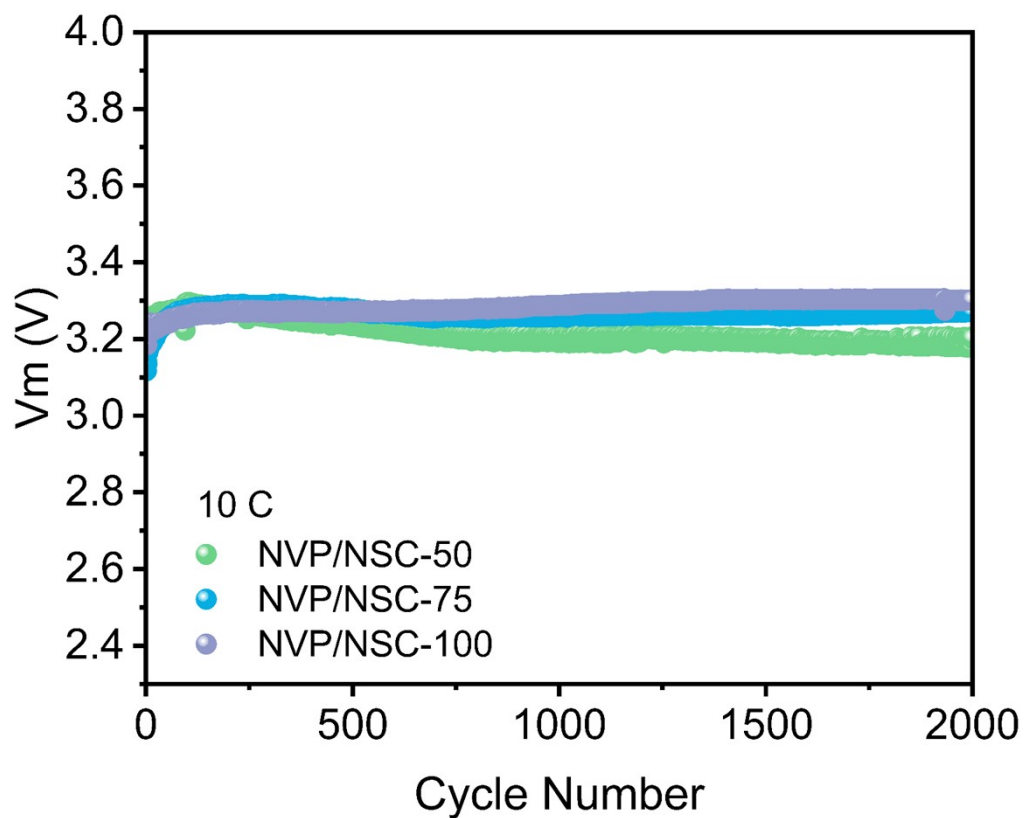

**Figure S12.** Medium voltages of NVP/NSC samples at the rate of 10 C for 2000 cycles.

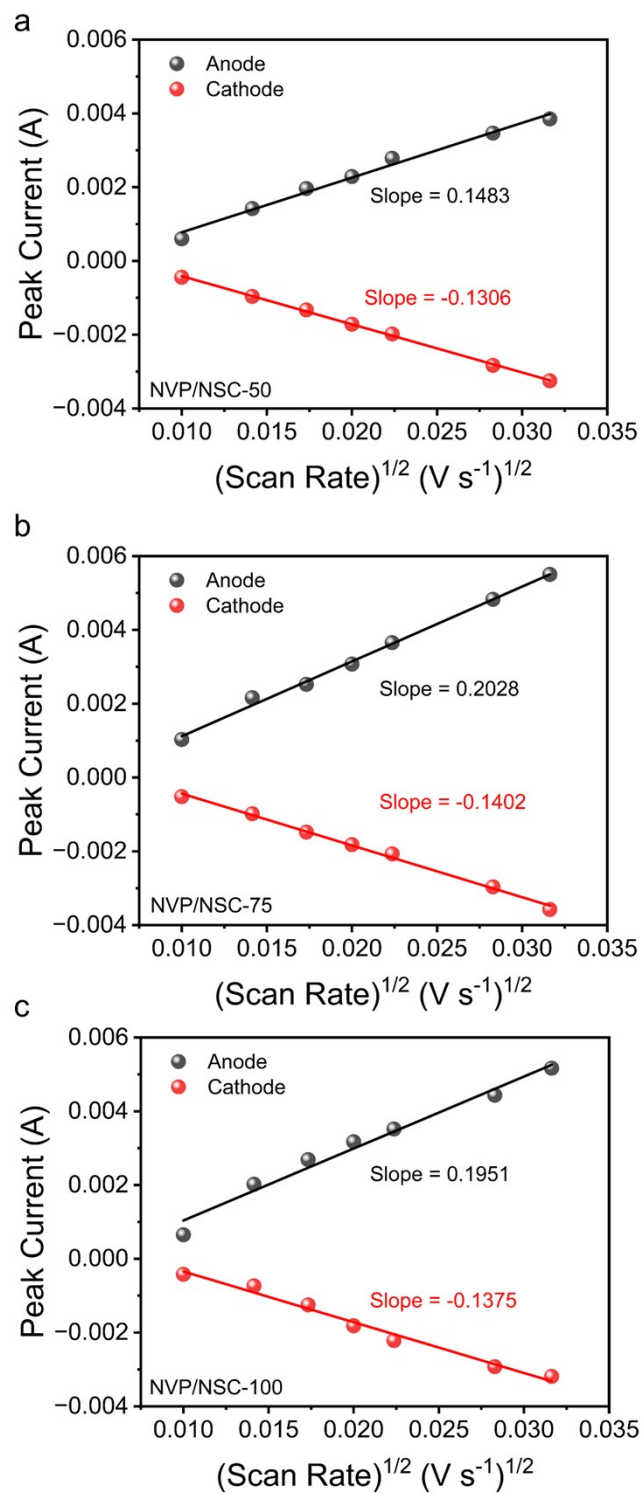

**Figure S13.** Linear fits for the anodic and cathodic peak currents versus scan rates of (a) NVP/NSC-50, (b) NVP/NSC-75 and (c) NVP/NSC-100.



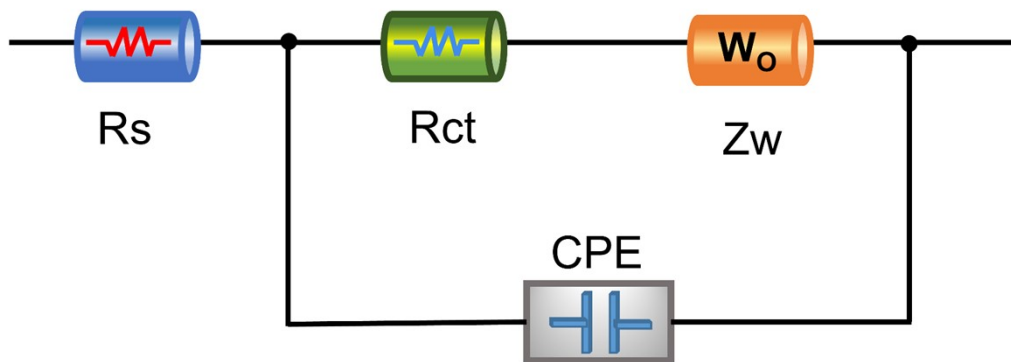

**Figure S14.** Equivalent circuit model used to fit experimental EIS data.

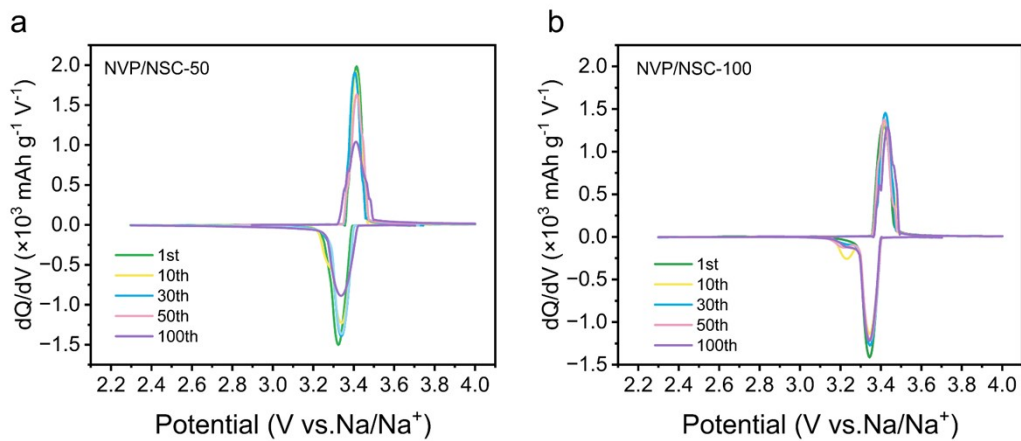

**Figure S15.** The  $dQ/dV$  curves of NVP/NSC-50 (a) and NVP/NSC100 (b) for the selected cycles at 1 C.

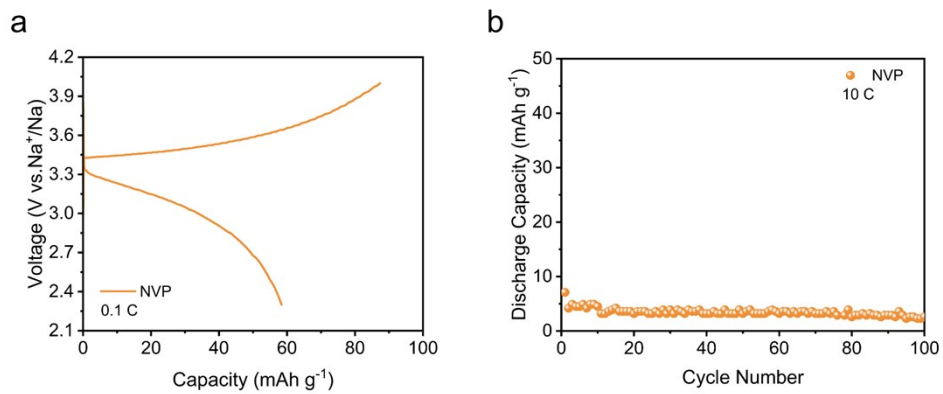

**Figure S16.** The GCD curves of NVP at 0.1 C (a) and cycling performance at the rate of 10 C after 100 cycles (b).

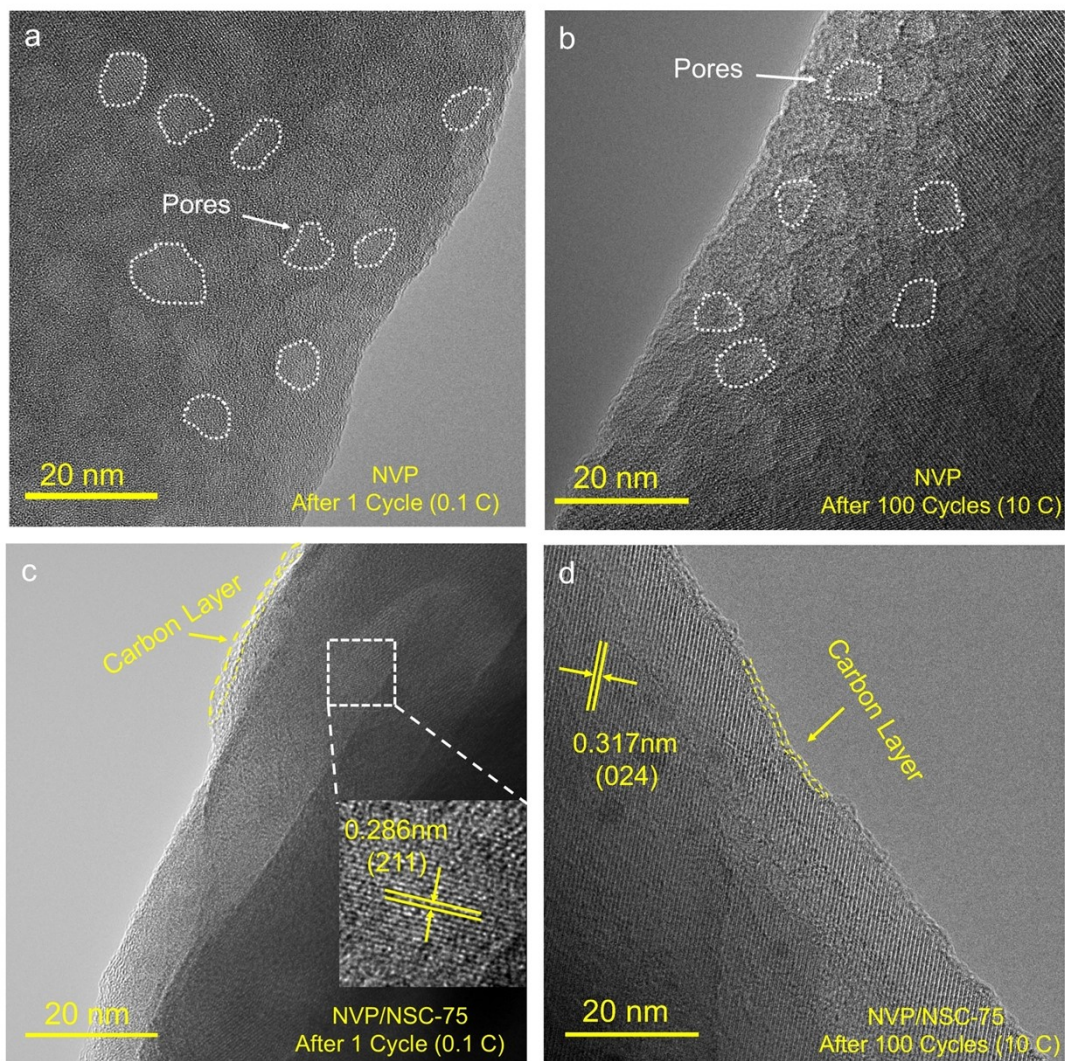

**Figure S17.** HRTEM images of NVP and NVP/NSC-75 after one cycle at 0.1 C (a, c) and after 100 cycles at 10 C (b, d).

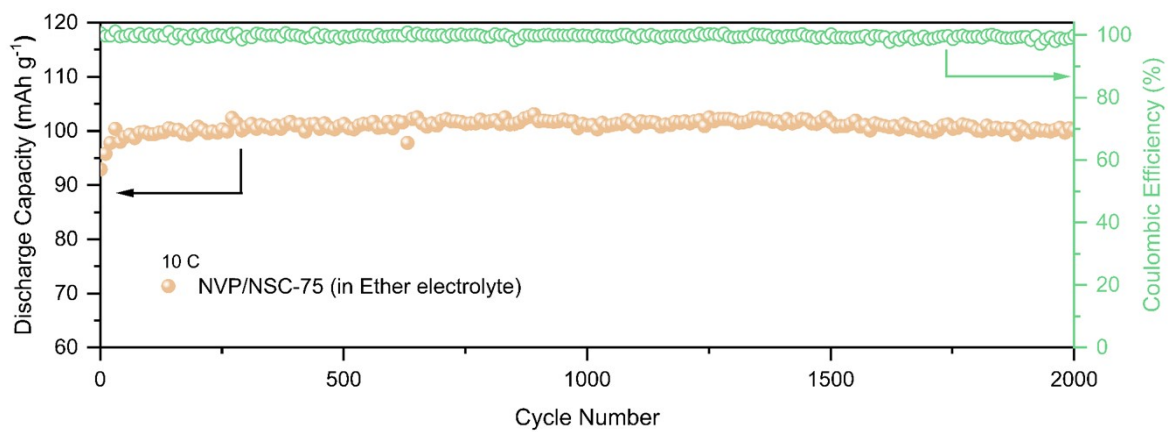

**Figure S18.** Specific capacity and coulombic efficiency of NVP/NSC-75 at a rate of 10 C for 2000 cycles in ether electrolyte.

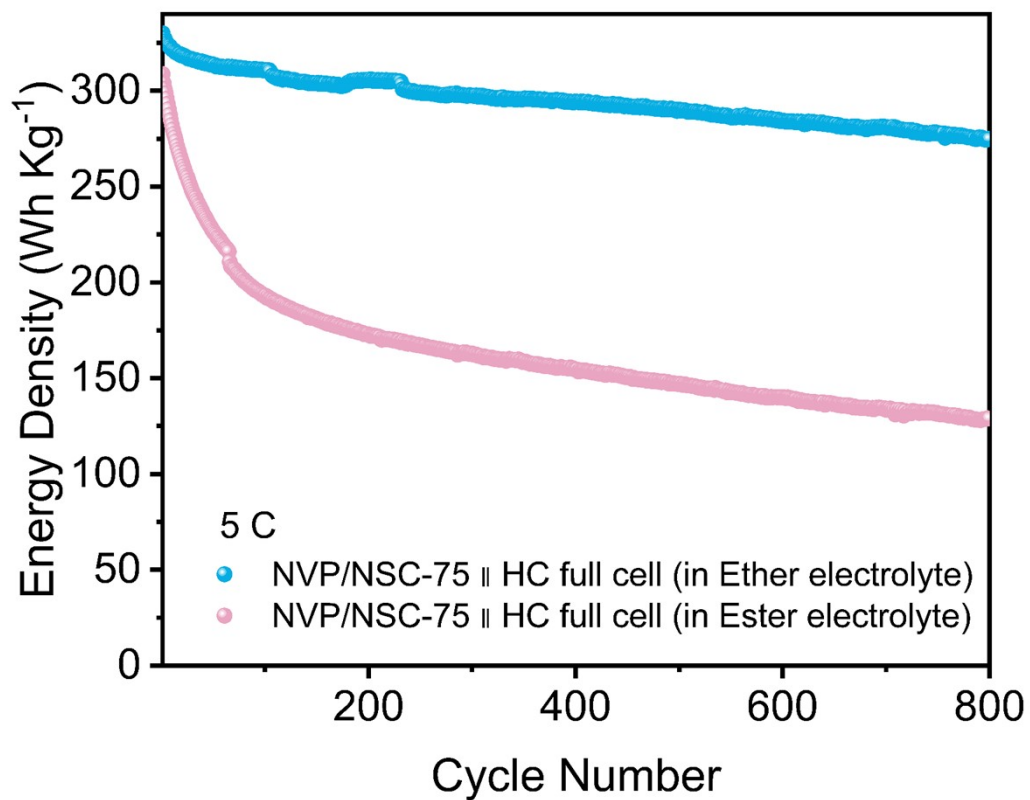

**Figure S19.** Energy density of NVP/NSC-75 || HC full cell for 800 cycles at 5 C in different electrolyte.

**Table S1.** Result of structural analysis obtained from XRD Rietveld refinement of samples NVP/NSC-50, NVP/NSC-75 and NVP/NSC-100

| Samples     | Lattice constant     |                    |                     | Reliability factors [%] |                |
|-------------|----------------------|--------------------|---------------------|-------------------------|----------------|
|             | a (= b) [Å]          | c [Å]              | V [Å <sup>3</sup> ] | R <sub>WP</sub>         | R <sub>P</sub> |
| NVP/NSC-50  | 8.73072<br>(0.00033) | 21.82444(0.00102)  | 1440.701(0.103)     | 5.20                    | 3.90           |
| NVP/NSC-75  | 8.73285<br>(0.00044) | 21.82199 (0.00134) | 1441.243(0.136)     | 7.20                    | 5.34           |
| NVP/NSC-100 | 8.73197<br>(0.00043) | 21.84524(0.00131)  | 1442.488(0.132)     | 4.61                    | 3.51           |

**Table S2.** Content ratio of C, N and S in N/S CDs and NVP/NSC series

| Samples     | C [%] | N [%] | S [%] |
|-------------|-------|-------|-------|
| N/S CDs     | 57.13 | 1.71  | 4.152 |
| NVP/NSC-50  | 1.10  | 0.24  | 0.099 |
| NVP/NSC-75  | 2.23  | 0.45  | 0.149 |
| NVP/NSC-100 | 3.43  | 0.43  | 0.161 |



**Table S3.** Comparison of electrochemical properties of other NVP materials

| Material                                                          | Carbon content [%] | Voltage window [V] | Rate performance [mAh g <sup>-1</sup> ]              | Capacity retention [%]                                                                                | Ref              |
|-------------------------------------------------------------------|--------------------|--------------------|------------------------------------------------------|-------------------------------------------------------------------------------------------------------|------------------|
| <b>NVP/NSC-75</b>                                                 | <b>2.23</b>        | <b>2.3-4.0</b>     | <b>83.2 at 100 C<br/>91 at 50 C<br/>98.8 at 20 C</b> | <b>72.2 at 10000 cycles at 100 C<br/>86.7 at 10000 cycles at 20 C<br/>97.8 at 2000 cycles at 10 C</b> | <b>This work</b> |
| Na <sub>3</sub> V <sub>2</sub> (PO <sub>4</sub> ) <sub>3</sub> /C | 17.68              | 2.5-4.0            | 96 at 20 C                                           | 78 at 7000 cycles at 20 C                                                                             | 7                |
| NVP@C-N150                                                        | 14.50              | 2.7-3.8            | 71 at 100 C                                          | 91 at 5000 cycles at 20 C                                                                             | 8                |
| HP-NVP@SC                                                         | 6.48               | 2.3-3.9            | 95 at 30 C                                           | 91 at 2500 cycles at 20 C                                                                             | 9                |
| NVP@3D-NSC                                                        | 13.27              | 2.3-3.9            | 54 at 80 C                                           | 77.6 at 6000 cycles at 20 C                                                                           | 10               |
| NVP@C+N@CNTs                                                      | 12.68              | 2.5-4.0            | 70 at 80 C                                           | 87 at 300 cycles at 30 C                                                                              | 11               |
| (C@NVP)@pC                                                        | 20                 | 2.3-3.9            | 74 at 100 C                                          | -                                                                                                     | 12               |
| NVP@rGO                                                           | -                  | 2.0-4.0            | 44 at 50 C                                           | 81 at 3000 cycles at 5 C                                                                              | 13               |
| NVP-CNF-6 h                                                       | 8.34               | 2.7-4.0            | 88.9 at 50 C                                         | 93 at 300 cycles at 1 C                                                                               | 14               |
| HP-NVP                                                            | 4.4                | 2.3-3.9            | 61 at 100 C                                          | 85 at 10000 cycles at 20 C                                                                            | 15               |
| NVP-TiO <sub>2</sub> /C                                           | -                  | 2.3-3.9            | 81.6 at 20 C                                         | 86 at 500 cycles at 10 C                                                                              | 16               |
| 900-NVP@C/G                                                       | 17.9               | 2.5-4.0            | 76 at 60 C                                           | 95 at 1000 cycles at 10 C                                                                             | 17               |
| PL-NVP@C                                                          | 4.95               | 2.3-3.9            | 72 at 50 C                                           | 91.3 at 2000 cycles at 10 C                                                                           | 18               |
| HCF-NVP                                                           | 6.41               | 2.0-3.9            | 78 at 100 C                                          | 54 at 20000 cycles at 30 C                                                                            | 19               |
| NVP/C                                                             | 2.0                | 2.0-4.0            | 70 at 100 C                                          | 50 at 5000 cycles at 50 C                                                                             | 20               |
| NVP@C-CNW                                                         | 2.33               | 2.3-3.9            | 62.2 at 60 C                                         | 80.6 at 1000 cycles at 20 C                                                                           | 21               |
| NVP@C@HC                                                          | 16.49              | 2.0-4.0            | 60.4 at 50 C                                         | 70.7 at 10000 cycles at 20 C                                                                          | 22               |
| NVP-Freestanding                                                  | 35.1               | 2.5-4.0            | 63 at 30 C                                           | 88.6 at 150 cycles at 0.5 C                                                                           | 23               |
| NVP/G                                                             | 6.14               | 2.2-4.0            | 70.1 at 30 C                                         | 86 at 300 cycles at 5 C                                                                               | 24               |
| NVP/C with 3D porous structure                                    | -                  | 2.0-4.0            | 74.4 at 50 C                                         | 90.4 At 2200 cycles at 20 C                                                                           | 25               |
| NVP/C                                                             | 9.3                | 2.5-3.8            | 89.5 at 50 C                                         | 94 at 500 cycles at 50 C                                                                              | 26               |

**Table S4.** Full cell performance comparison

| Symmetric full cell description                                           | Voltage range [V] | Discharge capacity [mAh g <sup>-1</sup> ] | Cycle performance                       | Ref              |
|---------------------------------------------------------------------------|-------------------|-------------------------------------------|-----------------------------------------|------------------|
| <b>NVP/NSC-75    1M NaPF<sub>6</sub>/Diglyme    HC</b>                    | <b>1.2-3.6</b>    | <b>115.3 at 5 C</b>                       | <b>92.1%-5 C (800 cycles)</b>           | <b>This work</b> |
| NMF-NVP/NC    1M NaClO <sub>4</sub> /EC+DEC with FEC    HC                | 1.5-3.7           | 75.9 at 5 C                               | 60%-1 C (200 cycles)                    | 27               |
| NVP/C    1M NaPF <sub>6</sub> /EC+DEC+FEC    S-doped C                    | 0.5-3.5           | 110 at 200 mA g <sup>-1</sup>             | 90%-200 mA g <sup>-1</sup> (100 cycles) | 7                |
| NVP@NSC    1M NaClO <sub>4</sub> /EC+PC with FEC    HC                    | 2.0-3.8           | 98.5 at 100 mA g <sup>-1</sup>            | 67.1%-1 C (100 cycles)                  | 28               |
| NVCP    1M NaPF <sub>6</sub> /Diglyme    HC                               | 1.9-3.8           | 115.1 at 1 C                              | 92.7%-1 C (150 cycles)                  | 29               |
| NVMP/C    1M NaClO <sub>4</sub> in EC/PC (1:1 v/v)    HC                  | 1.0-4.0           | 90 at 0.1 C                               | 90%-1 C (100 cycles)                    | 30               |
| NVP-Na2.5%    1M NaClO <sub>4</sub> in PC+FEC2%)    HC                    | 2.0-4.0           | 83.7 at 5 C                               | 93.4%-5-0.5 C (100 cycles)              | 31               |
| HP-NVP@SC    1M NaClO <sub>4</sub> in EC/DMC (1:1 v/v)    HP-NVP@SC       | 1.2-2.2           | 109.7 at 5 C                              | 91.2%-5 C (1000 cycles)                 | 9                |
| NVP@rGO    1M NaClO <sub>4</sub> in EC/DEC (1:1 v/v)    Sb/C              | -                 | 50 at 5 C                                 | 78%-0.5 C (40 cycles)                   | 13               |
| NVP: rGO-CNT    1M NaClO <sub>4</sub> in EC/DEC (1:1 v/v)    NVP: rGO-CNT | 1-2.2             | 110 at 1C                                 | 77%-10 C (100 cycles)                   | 32               |
| NVP/C-T    1M NaPF <sub>6</sub> in EC+DEC +FEC    NVP/C-T                 | 1.0-2.2           | 101.8 at 0.25 C                           | 87%-2 C (200 cycles)                    | 33               |

## Reference

1. L. Li, Y. Li, Y. Ye, R. Guo, A. Wang, G. Zou, H. Hou and X. Ji, Kilogram-Scale Synthesis and Functionalization of Carbon Dots for Superior Electrochemical Potassium Storage, *Acs Nano*, 2021, **15**, 6872-6885.
2. J. Hafner, Ab-initio simulations of materials using VASP: Density-functional theory and beyond, *J. Comput. Chem.*, 2008, **29**, 2044-2078.
3. Blochl, Projector augmented-wave method, *Physical review. B, Condensed matter*, 1994, **50**, 17953-17979.
4. Perdew, Burke and Ernzerhof, Generalized Gradient Approximation Made Simple, *Phys. Rev. Lett.*, 1996, **77**, 3865-3868.
5. S. Grimme, Semiempirical GGA-type density functional constructed with a long-range dispersion correction, *J. Comput. Chem.*, 2006, **27**, 1787-1799.
6. X. Rui, X. Zhang, S. Xu, H. Tan, Y. Jiang, L. Y. Gan, Y. Feng, C. C. Li and Y. Yu, A Low-Temperature Sodium-Ion Full Battery: Superb Kinetics and Cycling Stability, *Adv. Funct. Mater.*, 2021, **31**, 2009458.
7. P. Feng, W. Wang, K. Wang, S. Cheng and K. Jiang,  $\text{Na}_3\text{V}_2(\text{PO}_4)_3/\text{C}$  synthesized by a facile solid-phase method assisted with agarose as a high-performance cathode for sodium-ion batteries, *J. Mater. Chem. A*, 2017, **5**, 10261-10268.
8. Y. Yao, Y. Jiang, H. Yang, X. Sun and Y. Yu,  $\text{Na}_3\text{V}_2(\text{PO}_4)_3$  coated by N-doped carbon from ionic liquid as cathode materials for high rate and long-life Na-ion batteries, *Nanoscale*, 2017, **9**, 10880-10885.
9. W. Li, Z. J. Yao, Y. Zhong, C. A. Zhou, X. L. Wang, X. H. Xia, D. Xie, J. B. Wu, C. D. Gu and J. P. Tu, Enhancement of the advanced Na storage performance of  $\text{Na}_3\text{V}_2(\text{PO}_4)_3$  in a symmetric sodium full cell via a dual strategy design, *J. Mater. Chem. A*, 2019, **7**, 10231-10238.
10. Y. Jiang, H. C. Zhang, H. Yang, Z. Y. Qi and Y. Yu,  $\text{Na}_3\text{V}_2(\text{PO}_4)_3$ @nitrogen, sulfur-codoped 3D porous carbon enabling ultra-long cycle life sodium-ion batteries, *Nanoscale*, 2017, **9**, 6048-6055.
11. W. Shen, H. Li, Z. Guo, C. Wang, Z. Li, Q. Xu, H. Liu, Y. Wang and Y. Xia, Double-Nanocarbon Synergistically Modified  $\text{Na}_3\text{V}_2(\text{PO}_4)_3$ : An Advanced Cathode for High-Rate and Long-Life Sodium-Ion Batteries, *ACS Appl. Mater. Interfaces*, 2016, **8**, 15341-15351.
12. C. Zhu, K. Song, P. A. van Aken, J. Maier and Y. Yu, Carbon-Coated  $\text{Na}_3\text{V}_2(\text{PO}_4)_3$  Embedded in Porous Carbon Matrix: An Ultrafast Na-Storage Cathode with the Potential of Outperforming Li Cathodes, *Nano Lett.*, 2014, **14**, 2175-2180.
13. J. Zhang, Y. Fang, L. Xiao, J. Qian, Y. Cao, X. Ai and H. Yang, Graphene-Scaffolded  $\text{Na}_3\text{V}_2(\text{PO}_4)_3$  Microsphere Cathode with High Rate Capability and Cycling Stability for Sodium Ion Batteries, *ACS Appl. Mater. Interfaces*, 2017, **9**, 7177-7184.
14. J. Yang, D.-W. Han, M. R. Jo, K. Song, Y.-I. Kim, S.-L. Chou, H.-K. Liu and Y.-M. Kang,  $\text{Na}_3\text{V}_2(\text{PO}_4)_3$  particles partly embedded in carbon nanofibers with superb kinetics for ultra-high power sodium ion batteries, *J. Mater. Chem. A*, 2015, **3**, 1005-1009.
15. H. Xiong, G. Sun, Z. Liu, L. Zhang, L. Li, W. Zhang, F. Du and Z.-A. Qiao, Polymer Stabilized Droplet Templating towards Tunable Hierarchical Porosity in Single Crystalline  $\text{Na}_3\text{V}_2(\text{PO}_4)_3$  for Enhanced Sodium-Ion Storage, *Angew. Chem. Int. Ed.*, 2021, **60**, 10334-10341.
16. Y. Huang, X. Lia, J. Wang, L. Miao, C. Li, J. Han and Y. Huang, Superior Na-ion storage achieved by Ti substitution in  $\text{Na}_3\text{V}_2(\text{PO}_4)_3$ , *Energy Storage Mater.*, 2018, **15**, 108-115.
17. J. Fang, S. Wang, Z. Li, H. Chen, L. Xia, L. Ding and H. Wang, Porous  $\text{Na}_3\text{V}_2(\text{PO}_4)_3$ @C

- nanoparticles enwrapped in three-dimensional graphene for high performance sodium-ion batteries, *J. Mater. Chem. A*, 2016, **4**, 1180-1185.
18. E. Wang, W. Xiang, R. Rajagopalan, Z. Wu, J. Yang, M. Chen, B. Zhong, S. X. Dou, S. Chou, X. Guo and Y.-M. Kang, Construction of 3D pomegranate-like  $\text{Na}_3\text{V}_2(\text{PO}_4)_3$ /conducting carbon composites for high-power sodium-ion batteries, *J. Mater. Chem. A*, 2017, **5**, 9833-9841.
  19. Y. Fang, L. Xiao, X. Ai, Y. Cao and H. Yang, Hierarchical Carbon Framework Wrapped  $\text{Na}_3\text{V}_2(\text{PO}_4)_3$  as a Superior High-Rate and Extended Lifespan Cathode for Sodium-Ion Batteries, *Adv. Mater.*, 2015, **27**, 5895-5900.
  20. J. F. Yang, D. D. Li, X. S. Wang, X. X. Zhang, J. Xu and J. T. Chen, Constructing micro-nano  $\text{Na}_3\text{V}_2(\text{PO}_4)_3/\text{C}$  architecture for practical high-loading electrode fabrication as superior-rate and ultralong-life sodium ion battery cathode, *Energy Storage Mater.*, 2020, **24**, 694-699.
  21. Y. Jiang, Y. Yao, J. Shi, L. Zeng, L. Gu and Y. Yu, One-Dimensional  $\text{Na}_3\text{V}_2(\text{PO}_4)_3/\text{C}$  Nanowires as Cathode Materials for Long-Life and High Rate Na-Ion Batteries, *Chemnanomat*, 2016, **2**, 726-731.
  22. L. Chen, Y. Zhao, S. Liu and L. Zhao, Hard Carbon Wrapped  $\text{Na}_3\text{V}_2(\text{PO}_4)_3@C$  Porous Composite Extending Cycling Lifespan for Sodium-Ion Batteries, *ACS Appl. Mater. Interfaces*, 2017, **9**, 44485-44493.
  23. Q. Ni, Y. Bai, Y. Li, L. Ling, L. Li, G. Chen, Z. Wang, H. Ren, F. Wu and C. Wu, 3D Electronic Channels Wrapped Large-Sized  $\text{Na}_3\text{V}_2(\text{PO}_4)_3$  as Flexible Electrode for Sodium-Ion Batteries, *Small*, 2018, **14**, 1702864.
  24. S. Tao, X. Wang, P. Cui, Y. Wang, Y. A. Haleem, S. Wei, W. Huang, L. Song and W. Chu, Fabrication of graphene-encapsulated  $\text{Na}_3\text{V}_2(\text{PO}_4)_3$  as high-performance cathode materials for sodium-ion batteries, *Rsc Advances*, 2016, **6**, 43591-43597.
  25. B. Hou, L. Ma, X. Zang, N. Shang, J. Song, X. Zhao, C. Wang, J. Qi, J. Wang and R. Yu, Design and Construction of 3D Porous  $\text{Na}_3\text{V}_2(\text{PO}_4)_3/\text{C}$  as High Performance Cathode for Sodium Ion Batteries, *Chem. Res. Chin. Univ.*, 2021, **37**, 265-273.
  26. S. Bao, Y. Y. Huang, S. H. Luo and J. L. Lu, Porous  $\text{Na}_3\text{V}_2(\text{PO}_4)_3/\text{C}$  as cathode material for high-rate sodium-ion batteries by sacrificed template method, *Ionics*, 2020, **26**, 5011-5018.
  27. L. Zhao, H. Zhao, J. Wang, Y. Zhang, Z. Li, Z. Du, K. Swierczek and Y. Hou, Micro/Nano  $\text{Na}_3\text{V}_2(\text{PO}_4)_3/\text{N}$ -Doped Carbon Composites with a Hierarchical Porous Structure for High-Rate Pouch-Type Sodium-Ion Full-Cell Performance, *ACS Appl. Mater. Interfaces*, 2021, **13**, 8445-8454.
  28. X. H. Liang, X. Ou, F. H. Zheng, Q. C. Pan, X. H. Xiong, R. Z. Hu, C. H. Yang and M. L. Liu, Surface Modification of  $\text{Na}_3\text{V}_2(\text{PO}_4)_3$  by Nitrogen and Sulfur Dual-Doped Carbon Layer with Advanced Sodium Storage Property, *ACS Appl. Mater. Interfaces*, 2017, **9**, 13151-13162.
  29. Y. Wang, G. Su, X. Li, L. Hou, L. Liang and C. Yuan, Boosting sodium-storage properties of hierarchical  $\text{Na}_3\text{V}_2(\text{PO}_4)_3@C$  micro-flower cathodes by tiny Cr doping: The effect of "four ounces moving a thousand pounds", *Nano Research*, 2023, DOI: 10.1007/s12274-023-5555-8.
  30. Y. B. Rao, K. R. Achary and L. N. Patro, Enhanced Electrochemical Performance of the  $\text{Na}_3\text{V}_2(\text{PO}_4)_3/\text{C}$  Cathode Material upon Doping with Mn/Fe for Na-Ion Batteries, *Acs Omega*, 2022, DOI: 10.1021/acsomega.2c06261.
  31. X. Shen, Y. Su, N. Yang, X. Jiang, X. Liu, J. Mo, Y. Ran and F. Wu, Na plus -Activation Engineering in the  $\text{Na}_3\text{V}_2(\text{PO}_4)_3$  Cathode with Boosting Kinetics for Fast-Charging Na-Ion Batteries, *ACS Appl. Mater. Interfaces*, 2022, DOI: 10.1021/acsomega.2c12685.
  32. C. Zhu, P. Kopold, P. A. van Aken, J. Maier and Y. Yu, High Power-High Energy Sodium Battery Based on Threefold Interpenetrating Network, *Adv. Mater.*, 2016, **28**,

- 2409-2416.
33. R. Ling, S. Cai, D. Xie, X. Li, M. Wang, Y. Lin, S. Jiang, K. Shen, K. Xiong and X. Sun, Three-dimensional hierarchical porous  $\text{Na}_3\text{V}_2(\text{PO}_4)_3/\text{C}$  structure with high rate capability and cycling stability for sodium-ion batteries, *Chem. Eng. J.*, 2018, **353**, 264-272.
